# Supplementary material for: An Advanced Multiplex Real-Time Reverse Transcription Loop-Mediated Isothermal Amplification Assay for Rapid and Reliable Detection of Porcine Epidemic Diarrhea Virus and Porcine Internal Positive Control
Source: MDPI journal article supplement (doi:10.3390/v15112204), 2023-11-01
Supplement: s1 [file s1]

## Supplementary Material

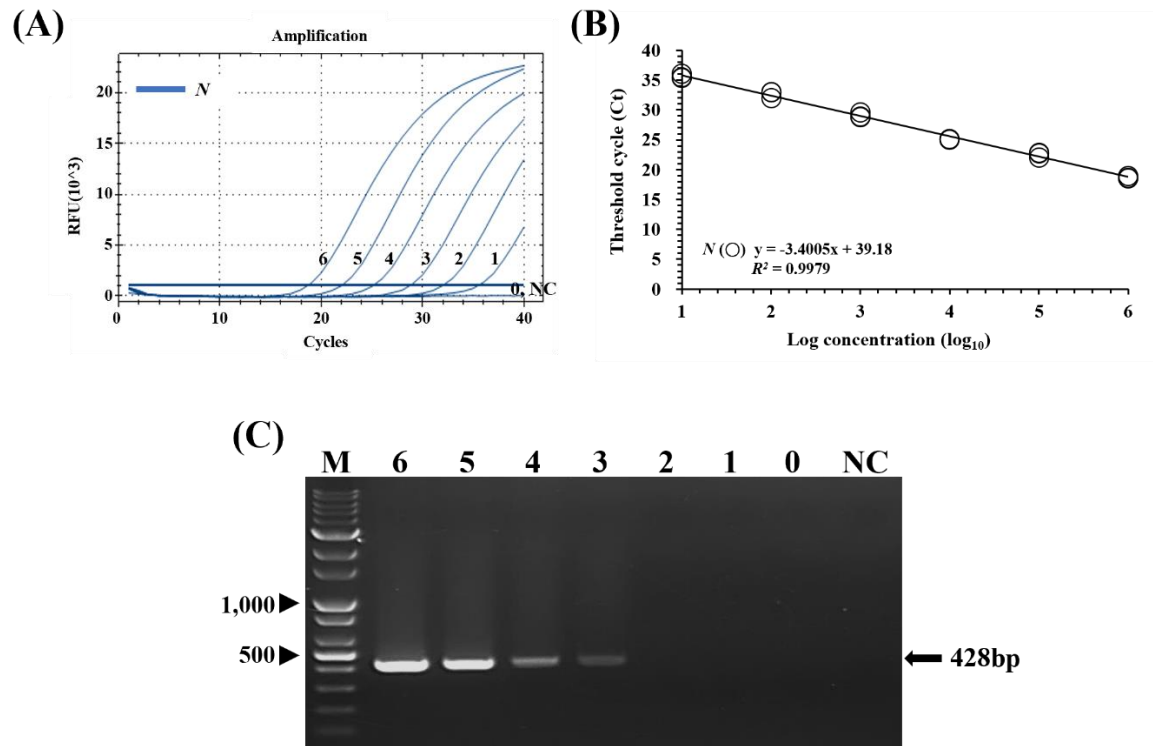

**Figure S1.** Sensitivities of real-time reverse transcription-polymerase chain reaction (qRT-PCR) and reverse transcription-polymerase chain reaction (RT-PCR) assay previously reported in other studies. (A, B) Limit of detection (LOD) of qRT-PCR assay and standard curve. (C) Electrophoretic analysis of RT-PCR amplified products. Amplification curve and electrophoretic analysis are shown using one of three replicates. Lines 6–0 show a 10-fold serial dilution of RNAs (from  $10^6$  to 1 copies/ $\mu$ L). Lane M, 1 kb plus DNA ladder. NC, negative controls (nuclease-free water).

**Table S1.** Comparison of diagnostic results for 14 discrepant clinical samples between the newly developed multiplex real-time reverse transcription loop-mediated isothermal amplification (mqRT-LAMP) assay and previously reported qRT-PCR and RT-PCR assays.

| NO | Sample code | Sample type | Results of different assays |                                   |                       |                |
|----|-------------|-------------|-----------------------------|-----------------------------------|-----------------------|----------------|
|    |             |             | mqRT-LAMP<br>(Tp value)     |                                   | qRT-PCR<br>(Ct value) | RT-PCR         |
|    |             |             | PEDV<br>N gene              | Sus scrofa<br>$\beta$ -actin gene | PEDV<br>N gene        | PEDV<br>N gene |
| 1  | KNU_25      | Feces       | 25.41                       | 15.74                             | 33.38                 | -              |
| 2  | KNU_27      | Feces       | 21.80                       | 19.48                             | 34.34                 | -              |
| 3  | KNU_56      | Feces       | 32.33                       | 11.50                             | -                     | -              |
| 4  | KNU_66      | Feces       | 30.13                       | 13.50                             | 35.40                 | -              |
| 5  | KNU_67      | Feces       | 12.92                       | 17.55                             | 36.55                 | -              |
| 6  | KNU_95      | Feces       | 27.77                       | 28.49                             | 33.04                 | -              |
| 7  | KNU_96      | Feces       | 22.15                       | 20.82                             | 33.72                 | -              |
| 8  | KNU_97      | Feces       | 22.36                       | 26.77                             | 33.05                 | -              |
| 9  | KNU_154     | Intestine   | 32.14                       | 11.94                             | 31.74                 | -              |
| 10 | KNU_158     | Intestine   | 9.35                        | 9.94                              | 15.41                 | -              |
| 11 | KNU_162     | Intestine   | 24.32                       | 10.08                             | 29.11                 | -              |
| 12 | KNU_163     | Intestine   | 26.23                       | 11.02                             | 32.58                 | -              |
| 13 | KNU_165     | Intestine   | 28.72                       | 10.00                             | 32.78                 | -              |
| 14 | KNU_183     | Intestine   | 13.75                       | 10.62                             | 23.73                 | -              |

‘-’, negative result.
